# Supplementary material
Source: HighWire-hosted journal article supplement (https://jme.bmj.com/content/jme-2022-108194)
Supplement: inline-supplementary-material-1 [file inline-supplementary-material-1.pdf]

## **Appendix – Race-based and Place-based Prioritization in COVID-19 Vaccine Allocation Through the Use of Disadvantage Indices: Public Attitudes and Framing Effects**

Harald Schmidt, PhD, Sonia Jawaid Shaikh, Emily Sadecki, Alison Buttenheim, Sarah E. Gollust

### Supplemental Material

- eMethods: Description of sample (p. 2)
- eTable 1: Support for prioritizing groups under the race, structural racism and disadvantage frames, by respondent characteristics (p. 3)

**eMethods**

Harris Insights & Analytics conducted an omnibus online poll (The Harris Poll) among US residents 18 years and older from April 13-16, 2021. Participants were recruited from online market research panels who opted into market research. Panelists are rewarded for taking part in surveys according to a structured incentive scheme, with the incentive amount offered for a survey determined by the length and content of the survey, the type of data being collected, the nature of the task, and the sample characteristics. The sample is a non-probability sample. To ensure representativeness of findings, two main processes are applied. First, purposive sampling and weights, to align the sample with the US General Population for ages 18+, based on the Current Population Survey from the Census (by education, age, gender, race/ethnicity, region, household income, household size, and marital status). Second, propensity scoring is applied to adjust for attitudinal and behavioral differences between respondents who are more likely to participate in online surveys (versus those who are less likely), those who are more likely to join online panels (versus those more reluctant), and those who responded to the survey that was fielded (versus those who did not). To minimizing non-response bias, survey invitations provide only basic links and information that is non-leading. Due to the way the sample is constructed and maintained, response rates that should be reported for probability samples cannot meaningfully be stated. The completion rate (completed surveys divided by number of respondents who entered the survey) was 63 % (see: American Association for Public Opinion Research. 2016. Standard definitions: Final dispositions of case codes and outcome rates for surveys. Available at: [https://www.aapor.org/AAPOR\\_Main/media/publications/Standard-Definitions20169theditionfinal.pdf](https://www.aapor.org/AAPOR_Main/media/publications/Standard-Definitions20169theditionfinal.pdf)).

**eTable 1. Support for prioritizing groups under the race, structural racism and disadvantage frames, by respondent characteristics**

|                                                           | Randomly-Assigned Frame |       |                    |       |                   |                    |                 |                    |                 |                    |                 |                    | Chi-square test of difference across characteristic by frame |                  |
|-----------------------------------------------------------|-------------------------|-------|--------------------|-------|-------------------|--------------------|-----------------|--------------------|-----------------|--------------------|-----------------|--------------------|--------------------------------------------------------------|------------------|
|                                                           | Race                    |       | Overall opposition |       | Structural Racism |                    |                 |                    | Disadvantage    |                    |                 |                    |                                                              |                  |
|                                                           | Overall support         |       |                    |       | Overall support   | Overall opposition | Overall support | Overall opposition | Overall support | Overall opposition | Overall support | Overall opposition |                                                              |                  |
| <b>Political orientation</b>                              | N                       | %     | N                  | %     | N                 | %                  | N               | %                  | N               | %                  | N               | %                  |                                                              | $\chi^2$ (p)     |
| Republican                                                | 57                      | 31.3% | 56                 | 30.8% | 53                | 24.9%              | 69              | 32.4%              | 79              | 39.5%              | 37              | 18.5%              | Race                                                         | 67.668 (<0.001)  |
| Democrat                                                  | 176                     | 66.4% | 40                 | 15.1% | 180               | 66.9%              | 17              | 6.3%               | 187             | 65.8%              | 33              | 11.6%              | Structural                                                   | 112.240 (<0.001) |
| Other                                                     | 63                      | 39.1% | 30                 | 18.6% | 57                | 31.7%              | 44              | 24.4%              | 74              | 46.0%              | 32              | 19.9%              | Disadvantage                                                 | 37.678 (<0.001)  |
| <b>Education</b>                                          | N                       | %     | N                  | %     | N                 | %                  | N               | %                  | N               | %                  | N               | %                  |                                                              | $\chi^2$ (p)     |
| < HS degree                                               | 30                      | 49.2% | 9                  | 14.8% | 27                | 37.0%              | 11              | 15.1%              | 20              | 35.1%              | 11              | 19.3%              | Race                                                         | 5.723 (0.221)    |
| HS degree to <4-yr college                                | 161                     | 43.9% | 78                 | 21.3% | 144               | 34.6%              | 88              | 21.2%              | 164             | 47.1%              | 45              | 12.9%              | Structural                                                   | 41.060 (<0.001)  |
| 4-yr college (or more)                                    | 128                     | 52.5% | 47                 | 19.3% | 126               | 58.3%              | 42              | 19.4%              | 168             | 60.0%              | 51              | 18.2%              | Disadvantage                                                 | 30.035 (<0.001)  |
| <b>Race</b>                                               | N                       | %     | N                  | %     | N                 | %                  | N               | %                  | N               | %                  | N               | %                  |                                                              | $\chi^2$ (p)     |
| White                                                     | 215                     | 47.1% | 87                 | 19.1% | 151               | 35.3%              | 111             | 25.9%              | 210             | 49.2%              | 62              | 14.5%              | Race                                                         | 7.194 (0.516)    |
| Hispanic                                                  | 38                      | 56.7% | 10                 | 14.9% | 70                | 50.7%              | 12              | 8.7%               | 52              | 50.0%              | 17              | 16.3%              | Structural                                                   | 43.558 (<0.001)  |
| Black                                                     | 37                      | 43.0% | 24                 | 27.9% | 38                | 55.1%              | 7               | 10.1%              | 58              | 61.7%              | 18              | 19.1%              | Disadvantage                                                 | 11.692 (0.165)   |
| Asian                                                     | 21                      | 47.7% | 10                 | 22.7% | 28                | 66.7%              | 3               | 7.1%               | 18              | 47.4%              | 7               | 18.4%              |                                                              |                  |
| All others                                                | 8                       | 38.1% | 5                  | 23.8% | 10                | 35.7%              | 9               | 32.1%              | 15              | 60.0%              | 4               | 16.0%              |                                                              |                  |
| <b>Employment</b>                                         | N                       | %     | N                  | %     | N                 | %                  | N               | %                  | N               | %                  | N               | %                  |                                                              | $\chi^2$ (p)     |
| Employed (FT, PT or Self)                                 | 189                     | 50.4% | 76                 | 20.3% | 187               | 47.0%              | 80              | 20.1%              | 201             | 52.1%              | 61              | 15.8%              | Race                                                         | 4.141 (0.126)    |
| All Other (Unemployed, Retired, Student, Homemaker, etc.) | 131                     | 43.8% | 59                 | 19.7% | 110               | 35.8%              | 61              | 19.9%              | 151             | 50.3%              | 46              | 15.3%              | Structural                                                   | 11.055 (0.004)   |
|                                                           |                         |       |                    |       |                   |                    |                 |                    |                 |                    |                 |                    | Disadvantage                                                 | 0.372 (0.830)    |
| <b>Income</b>                                             | N                       | %     | N                  | %     | N                 | %                  | N               | %                  | N               | %                  | N               | %                  |                                                              | $\chi^2$ (p)     |
| Less Than \$50k                                           | 67                      | 37.0% | 41                 | 22.7% | 78                | 37.3%              | 33              | 15.8%              | 94              | 45.0%              | 33              | 15.8%              | Race                                                         | 24.948 (0.002)   |
| \$50k-\$74.9k                                             | 68                      | 54.8% | 21                 | 16.9% | 42                | 39.6%              | 20              | 18.9%              | 46              | 46.0%              | 14              | 14.0%              | Structural                                                   | 24.843 (0.002)   |
| \$75k-\$99.9k                                             | 26                      | 36.6% | 11                 | 15.5% | 48                | 44.0%              | 22              | 20.2%              | 47              | 51.6%              | 9               | 9.9%               | Disadvantage                                                 | 20.092 (0.01)    |
| \$100k+                                                   | 144                     | 52.9% | 57                 | 21.0% | 121               | 46.7%              | 66              | 25.5%              | 158             | 58.3%              | 49              | 18.1%              |                                                              |                  |
